# Supplementary material
Source: MDPI journal article supplement (https://www.mdpi.com/2073-4441/13/6/792)
Supplement: s1 [file s1]

# Future Flood Hazard Assessment for the City of Pamplona (Spain) Using an Ensemble of Climate Change Projections

Marco Lompi <sup>1,2,\*</sup>, Luis Mediero <sup>2</sup> and Enrica Caporali <sup>1</sup>

<sup>1</sup> Department of Civil and Environmental Engineering, University of Florence, 50139 Florence, Italy; enrica.caporali@unifi.it

<sup>2</sup> Departamento de Ingeniería Civil, Hidráulica, Energía y Medio Ambiente, Universidad Politécnica de Madrid (UPM), 28040 Madrid, Spain; luis.mediero@upm.es

\* Correspondence: marco.lompi@unifi.it ; Tel.: +39 3386435764

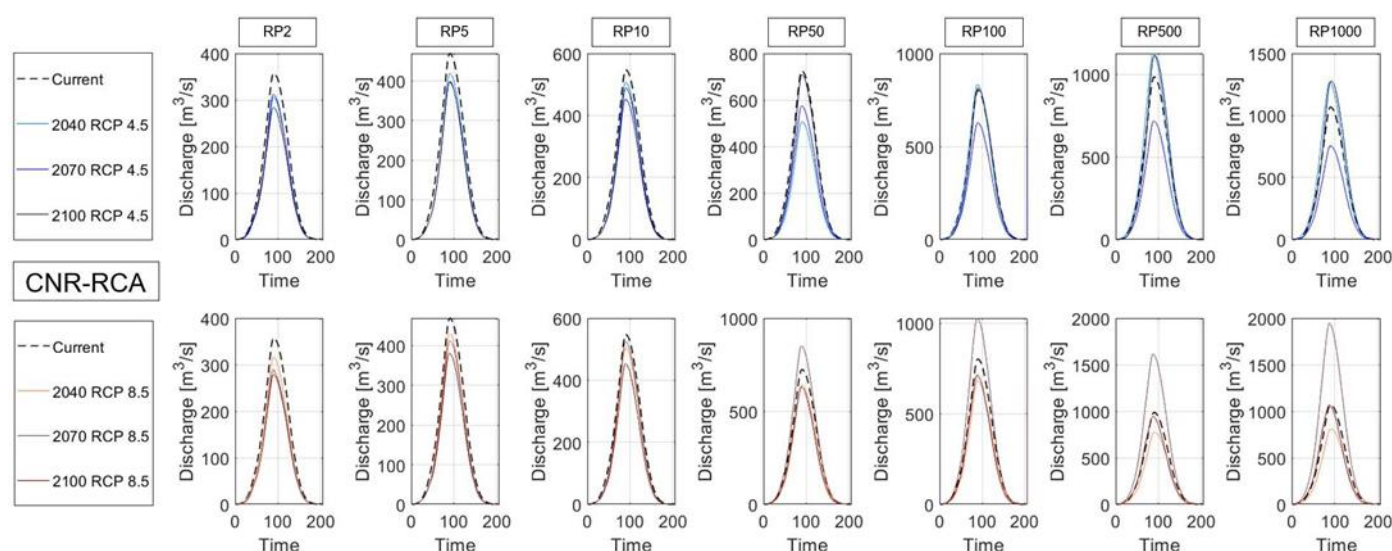

**Figure S1.** Hydrographs for the current (dashed black) and climate change (coloured) scenarios for the CNR-RCA climate model in the 3 periods. Columns show return periods. The upper row shows results for the RCP 4.5 and the lower row for the RCP 8.5.

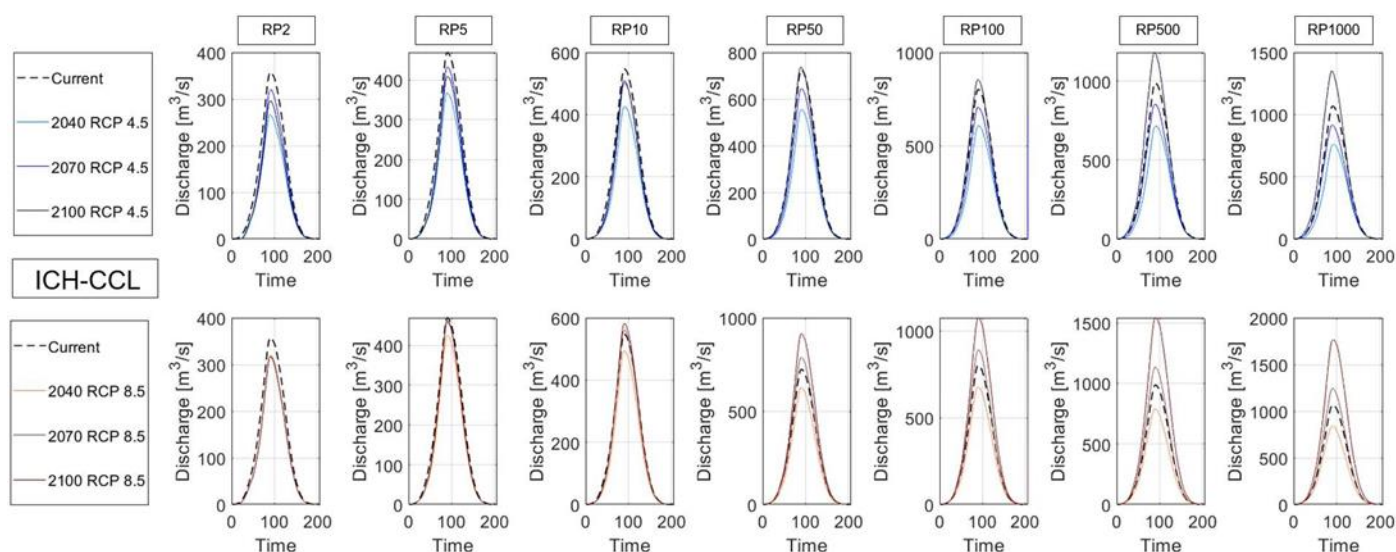

**Figure S2.** Hydrographs for the current (dashed black) and climate change (coloured) scenarios for the ICH-CCL climate model in the 3 periods. Columns show return periods. The upper row shows results for the RCP 4.5 and the lower row for the RCP 8.5.

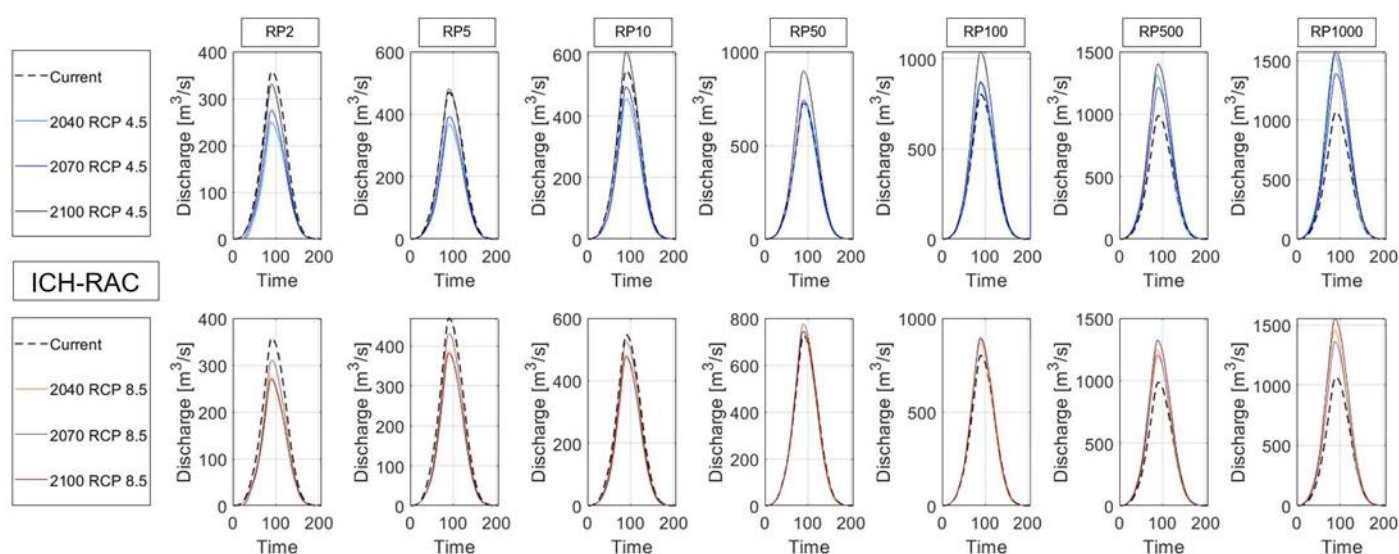

**Figure S3.** Hydrographs for the current (dashed black) and climate change (coloured) scenarios for the ICH-RAC climate model in the 3 periods. Columns show return periods. The upper row shows results for the RCP 4.5 and the lower row for the RCP 8.5.

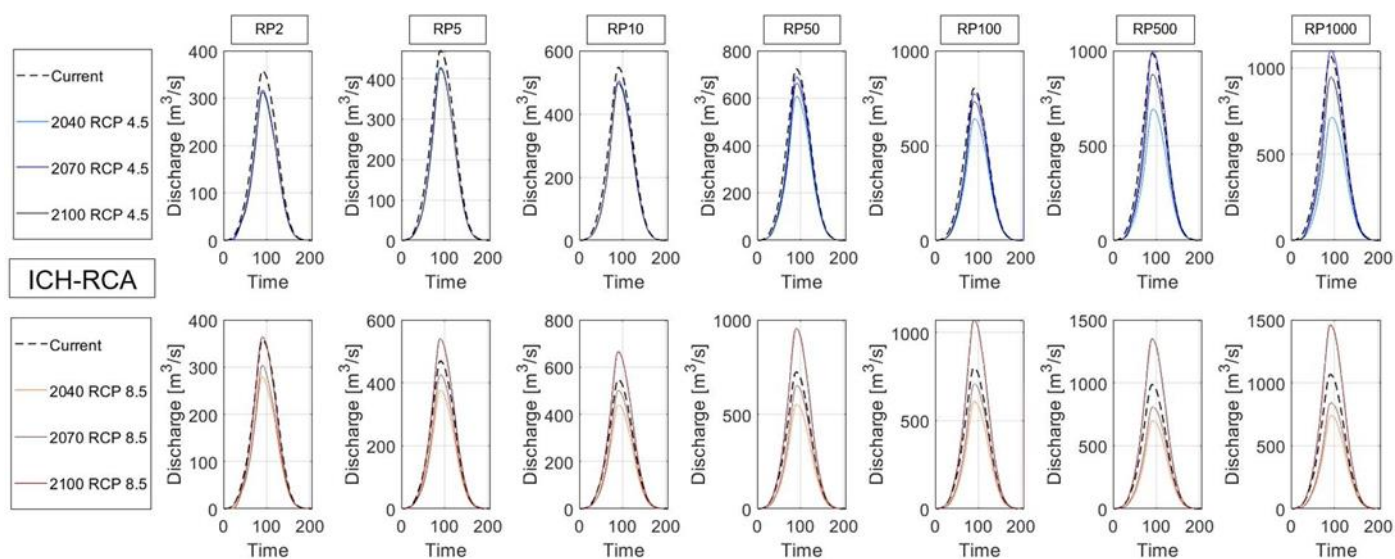

**Figure S4.** Hydrographs for the current (dashed black) and climate change (coloured) scenarios for the ICH-RCA climate model in the 3 periods. Columns show return periods. The upper row shows results for the RCP 4.5 and the lower row for the RCP 8.5.

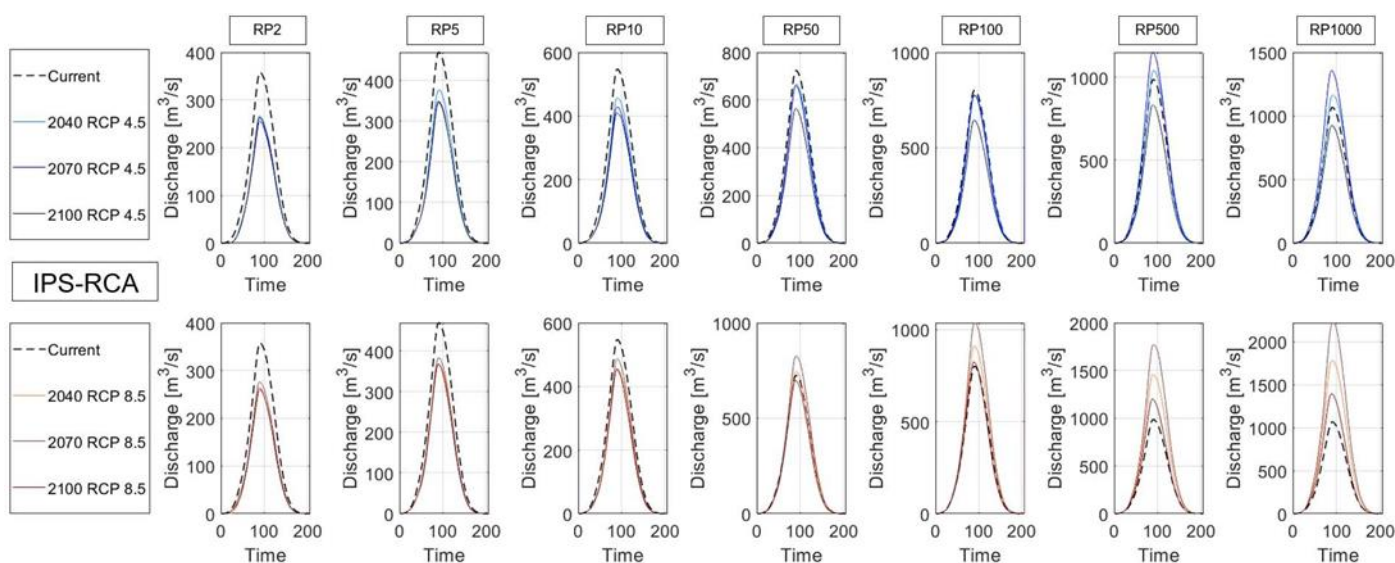

**Figure S5.** Hydrographs for the current (dashed black) and climate change (coloured) scenarios for the IPS-RCA climate model in the 3 periods. Columns show return periods. The upper row shows results for the RCP 4.5 and the lower row for the RCP 8.5.



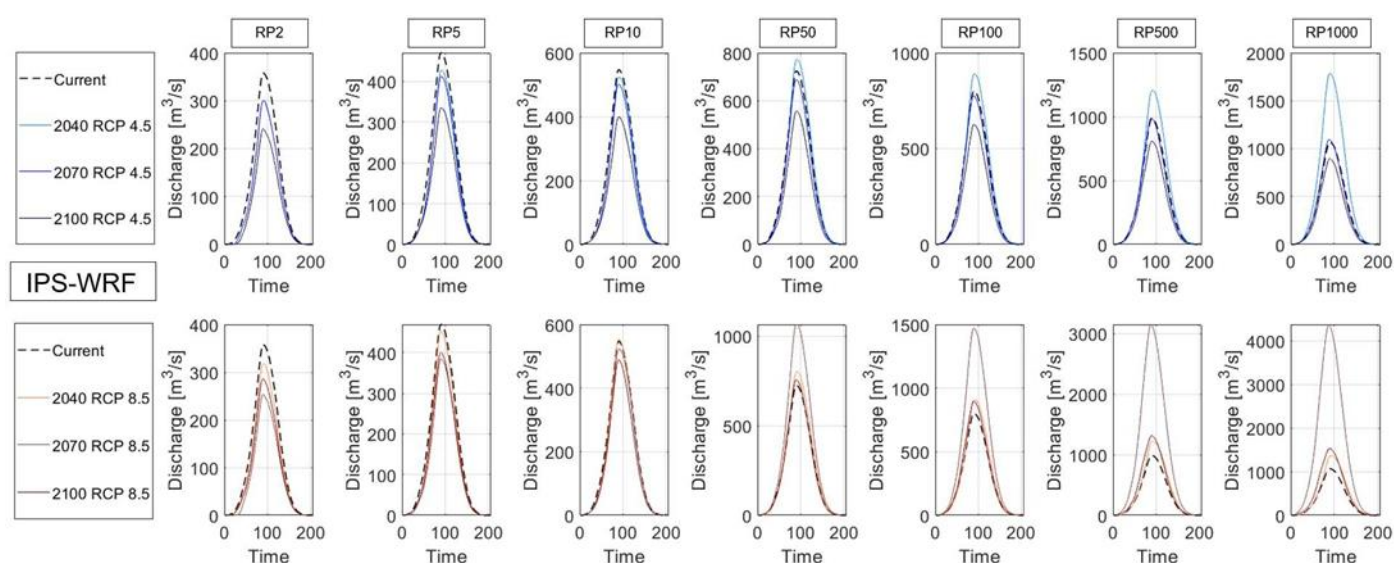

**Figure S6.** Hydrographs for the current (dashed black) and climate change (coloured) scenarios for the IPS-WRF climate model in the 3 periods. Columns show return periods. The upper row shows results for the RCP 4.5 and the lower row for the RCP 8.5.

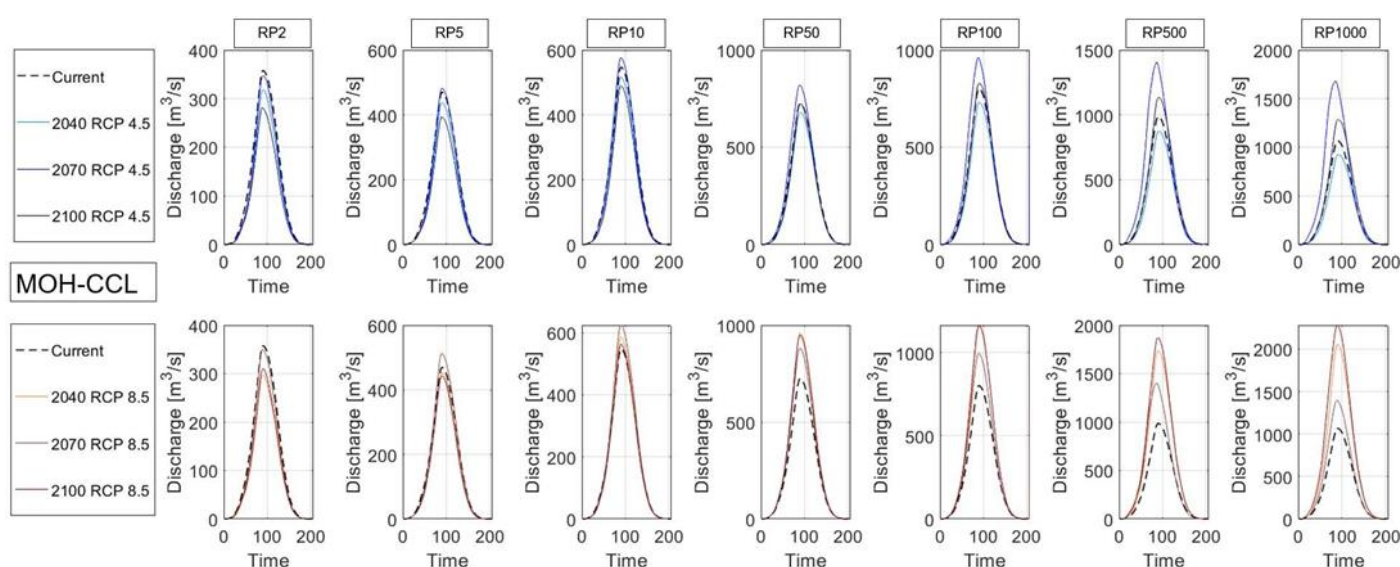

**Figure S7.** Hydrographs for the current (dashed black) and climate change (coloured) scenarios for the MOH-CCL climate model in the 3 periods. Columns show return periods. The upper row shows results for the RCP 4.5 and the lower row for the RCP 8.5.

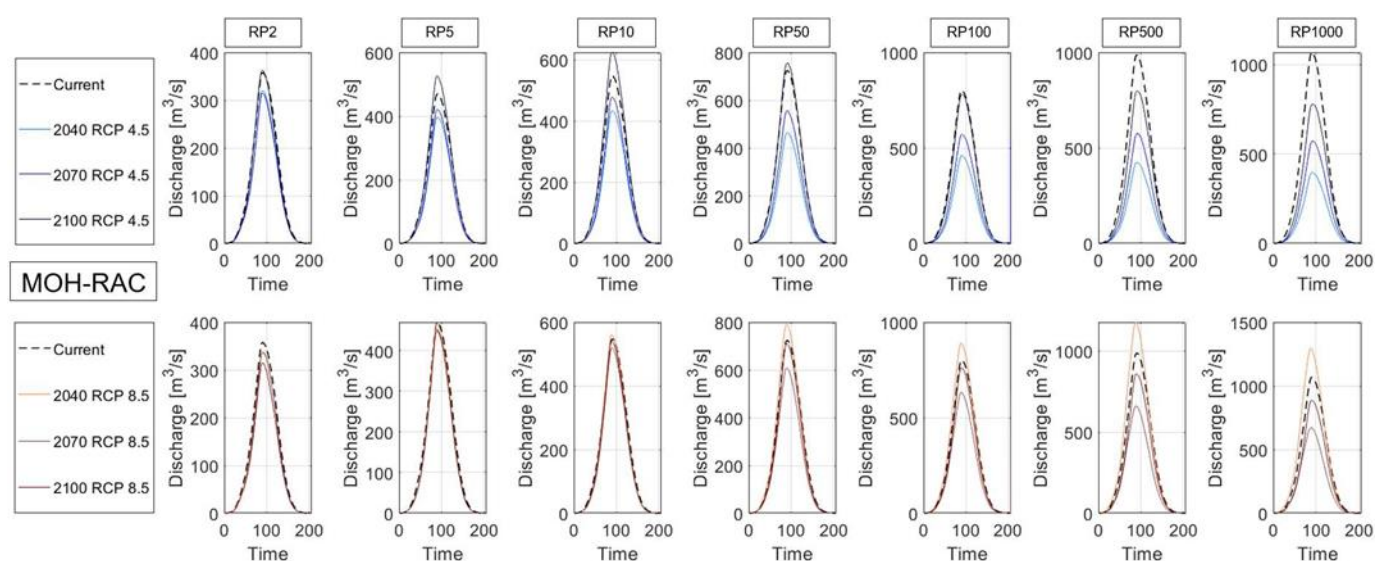

**Figure S8.** Hydrographs for the current (dashed black) and climate change (coloured) scenarios for the MOH-RAC climate model in the 3 periods. Columns show return periods. The upper row shows results for the RCP 4.5 and the lower row for the RCP 8.5.

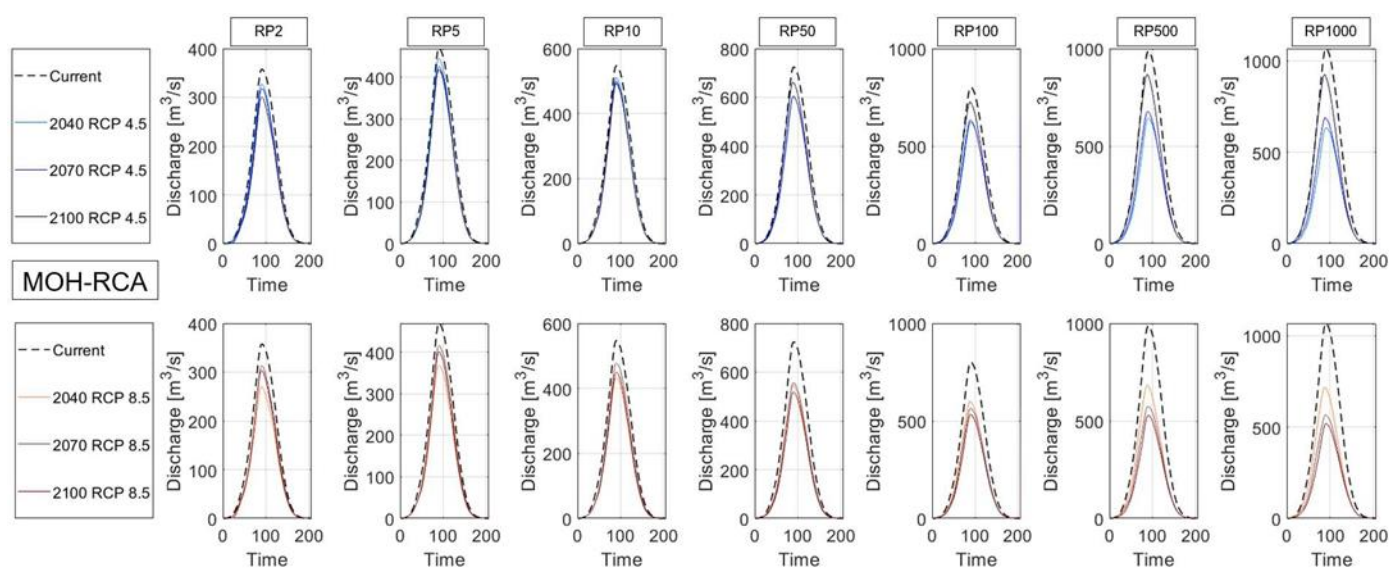

**Figure S9.** Hydrographs for the current (dashed black) and climate change (coloured) scenarios for the MOH-RCA climate model in the 3 periods. Columns show return periods. The upper row shows results for the RCP 4.5 and the lower row for the RCP 8.5.

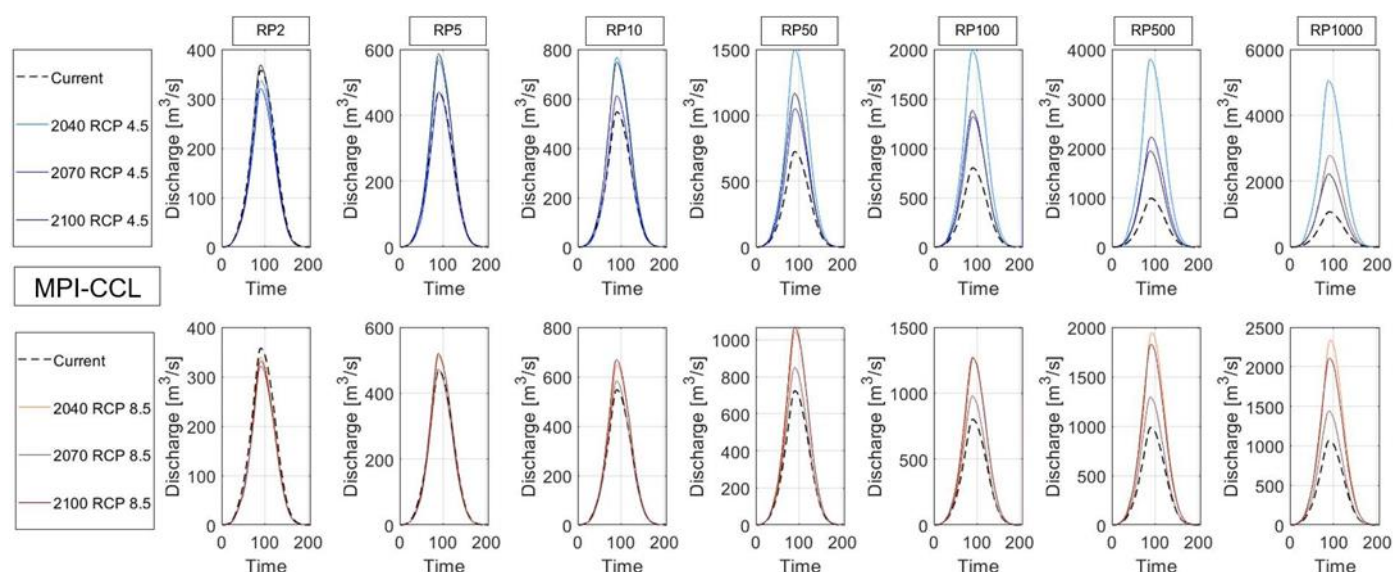

**Figure S10.** Hydrographs for the current (dashed black) and climate change (coloured) scenarios for the MPI-CCL climate model in the 3 periods. Columns show return periods. The upper row shows results for the RCP 4.5 and the lower row for the RCP 8.5.

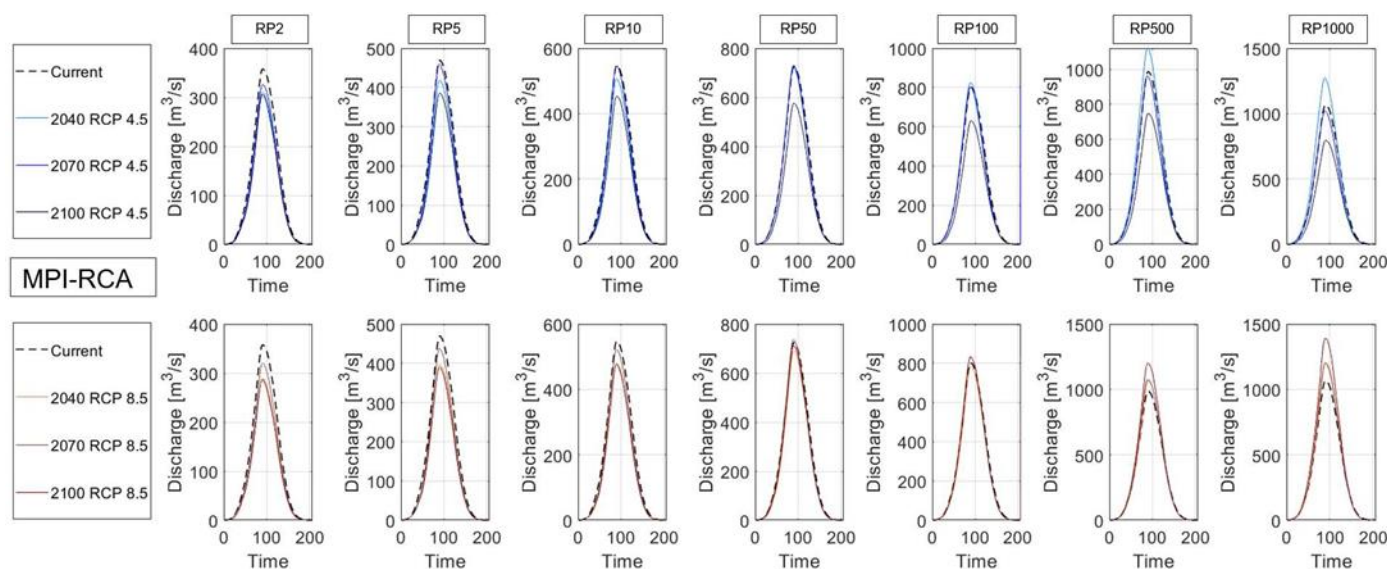

**Figure S11.** Hydrographs for the current (dashed black) and climate change (coloured) scenarios for the MPI-RCA climate model in the 3 periods. Columns show return periods. The upper row shows results for the RCP 4.5 and the lower row for the RCP 8.5.
